# Supplementary material
Source: PubMed Central journal article supplement (PMC4007458)
Supplement: supp_M114.558981_jbc.M114.558981-1.pdf [file supp_M114.558981_jbc.M114.558981-1.pdf]

**Supplementary videos. Time-lapse microscopy of cell migration in C18ORF1-knockdown cells.** A549 cells carrying control shRNA or C18ORF1-specific shRNA were stimulated with TGF- $\beta$  for 26 h. Images were recorded every one hour by time-lapse microscopy. (a) control shRNA without TGF- $\beta$  (b) control shRNA with TGF- $\beta$  (c) C18ORF1 shRNA#1 without TGF- $\beta$  (d) C18ORF1 shRNA#1 with TGF- $\beta$  (e) C18ORF1 shRNA#2 without TGF- $\beta$  (f) C18ORF1 shRNA#2 with TGF- $\beta$ .
